# Supplementary material
Source: Springer Nature journal article supplement (https://www.springermedizin.de/resource/supplementary/12913_2012_2402_MOESM7_ESM.pdf/9530452)

**MRSA prevalence risk inpatients**

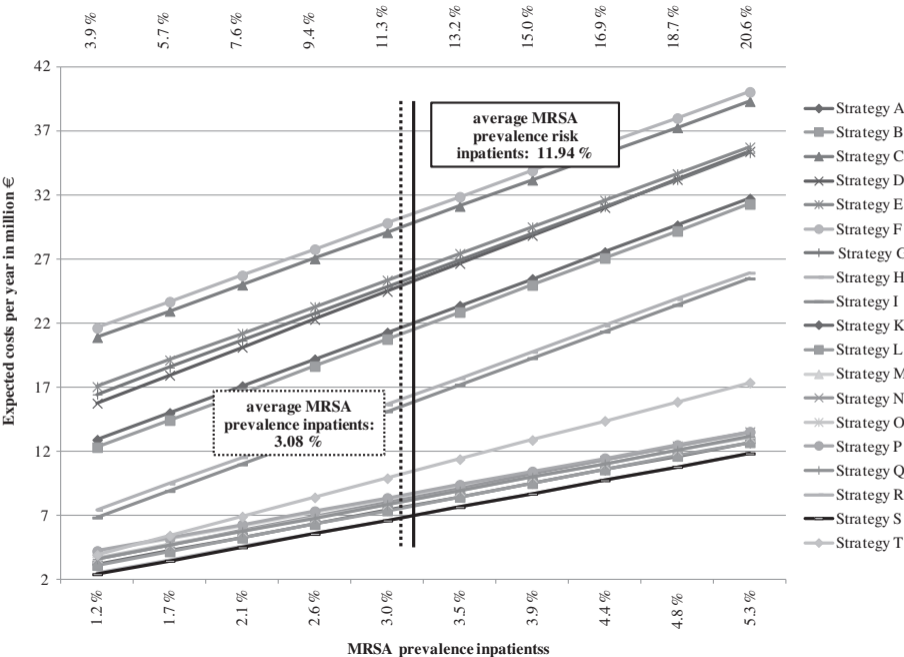

Supplement: MOESM7 [file 9530452]
